# Supplementary material for: Intestinal Tissues Induce an SNP Mutation in Pseudomonas aeruginosa That Enhances Its Virulence: Possible Role in Anastomotic Leak
Source: PLOS journal article supplement (doi:10.1371/journal.pone.0044326), 2012-08-31
Supplement: S1 (10.1371/journal.pone.0044326.s001) [file journal.pone.0044326.s001.pdf › journal.pone.0044326.s001.pdf]

Group IV: preoperative irradiation followed by anastomosis and cecal injection of *P. aeruginosa*

Group II: anastomosis and cecal injection of *P. aeruginosa*

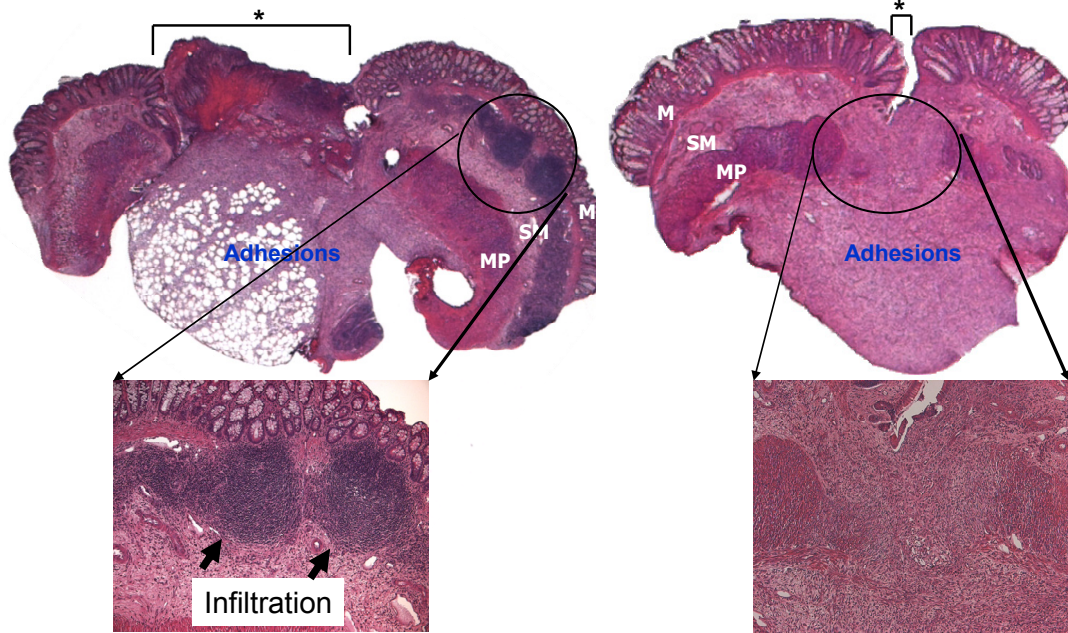

**Supplemental Fig.S1.** Histological analysis of anastomotic tissues from rats of experimental groups II and IV. M= mucosa; SM= submucosa; MP= muscularis propria; \* = anastomosis.
